# Supplementary material for: A Prediction Model for Metachronous Peritoneal Carcinomatosis in Patients with Stage T4 Colon Cancer after Curative Resection
Source: MDPI journal article supplement (doi:10.3390/cancers13112808), 2021-06-04
Supplement: s1 [file s1]

**Table S1.** Assessment of proportional hazard assumption.

|                        | Chi-squared Statistics | Degrees of Freedom | <i>p</i> -value |
|------------------------|------------------------|--------------------|-----------------|
| Tumor location         | 0.007                  | 1                  | 0.93            |
| Preoperative CEA value | 0.522                  | 1                  | 0.47            |
| Histologic grade       | 0.873                  | 1                  | 0.35            |
| Tumor stage            | 0.764                  | 1                  | 0.38            |
| N1 stage               | 0.247                  | 1                  | 0.62            |
| N2 stage               | 0.096                  | 1                  | 0.76            |
| Global                 | 2.261                  | 6                  | 0.89            |
